# Supplementary material for: Reduction in Incidence of Hospitalizations for Psychotic Episodes Through Early Identification and Intervention
Source: Atypon-hosted journal article supplement (doi:10.1176/appi.ps.201300336), 2014-03-17

**Figure 1. Rates of hospital admission for first episode psychosis: Greater Portland Area vs. Urban Control Area, before (blue) and after (red) implementation of the PIER program**

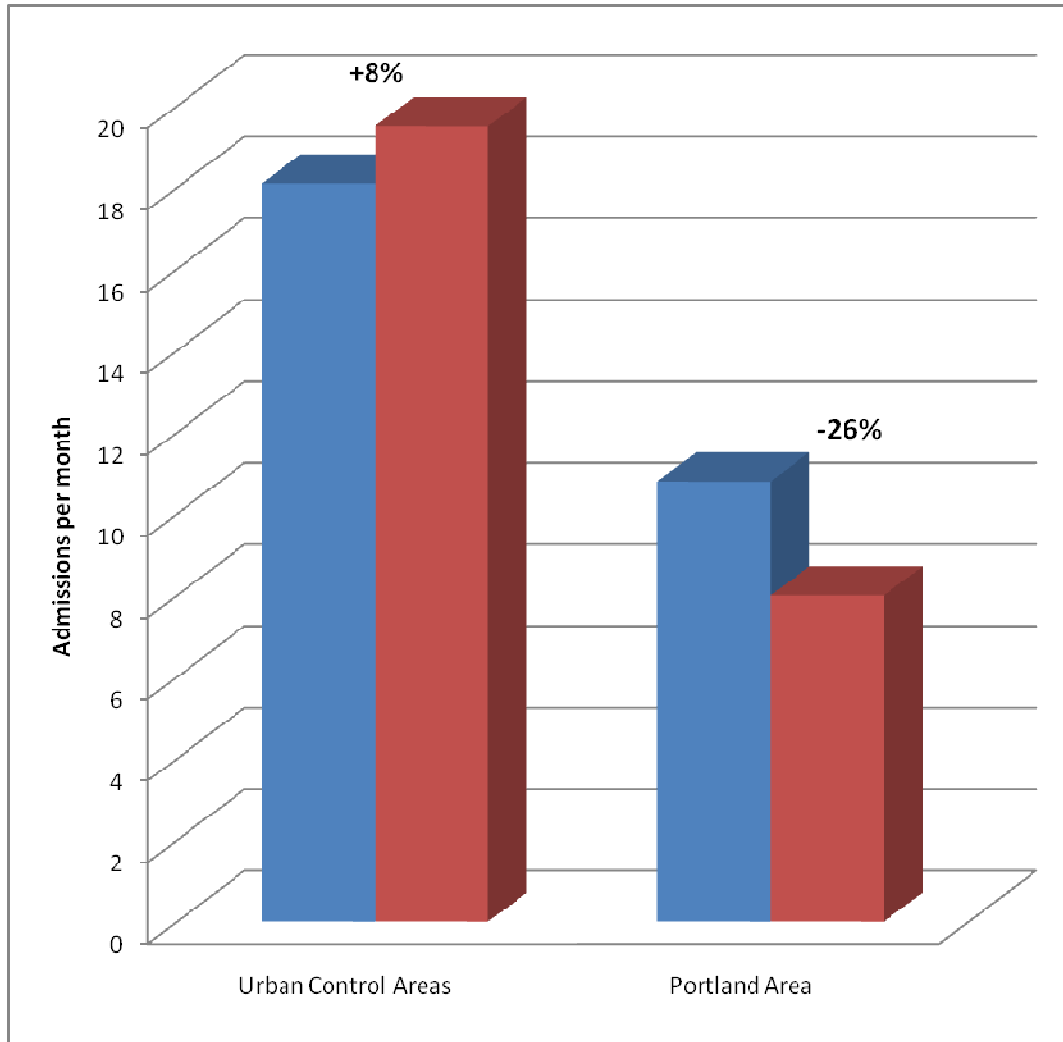

Supplement: 1194_ds001.pdf [file 1194_ds001.pdf]
